# Supplementary material
Source: MDPI journal article supplement (https://www.mdpi.com/1424-8247/14/12/1249)
Supplement: s1 [file s1]

# **Supplementary Material**

## ***De Novo* Molecular Design of Caspase-6 Inhibitors by GRU-Based Recurrent Neural Network Combined with Transfer Learning Approach**

Shuheng Huang<sup>1</sup>, Hu Mei<sup>1\*</sup>, Laichun Lu<sup>1\*</sup>, Minyao Qiu<sup>1</sup>, Xiaoqi Liang<sup>1</sup>, Lei Xu<sup>1</sup>, Zuyin Kuang<sup>1</sup>, Yu Heng<sup>1</sup>, Xianchao Pan<sup>2\*</sup>

<sup>1</sup> Key Laboratory of Biorheological Science and Technology (Ministry of Education), College of Bioengineering, Chongqing University, Chongqing 400044, China

<sup>2</sup> Department of Medicinal Chemistry, School of Pharmacy, Southwest Medical University, Luzhou, Sichuan, 646000, China

### **Table of contents**

|           | <b>Contents</b>                                                                        | <b>Page</b> |
|-----------|----------------------------------------------------------------------------------------|-------------|
| Table S1  | The statistic information of the known caspase-6 inhibitors dataset                    | S2          |
| Table S2  | The information of 1656 samples                                                        | S3          |
| Table S3  | Definitions of 200 RDKit descriptors                                                   | S4-7        |
| Table S4  | The representative confusion matrices of five machine learning models on training set  | S8          |
| Table S5  | The representative confusion matrices of five machine learning models on validationset | S8          |
| Table S6  | The 5-fold cross-validation results of the ML models                                   | S9          |
| Table S7  | The representative confusion matrices of five machine learning models on test set      | S9          |
| Figure S1 | Result of molecular docking                                                            | S10         |

**Table S1.** The statistic information of the known caspase-6 inhibitors dataset

| PubChem AID           | Training/validation sets |                | Test set <sup>†</sup> |                  |
|-----------------------|--------------------------|----------------|-----------------------|------------------|
|                       | Inhibitors               | Non-inhibitors | Inhibitors            | Non-inhibitors   |
| 49547 <sup>1</sup>    | -                        | -              | 1                     | -                |
| 49549 <sup>2</sup>    | 7                        | -              | 2                     | -                |
| 49550 <sup>3</sup>    | 4                        | -              | -                     | -                |
| 49551 <sup>4</sup>    | -                        | 3              | -                     | -                |
| 49555 <sup>5</sup>    | 27                       | -              | 10                    | -                |
| 49557 <sup>5</sup>    | -                        | -              | 2                     | -                |
| 49556 <sup>6</sup>    | 12                       | -              | 1                     | -                |
| 49558 <sup>6</sup>    | 1                        | -              | -                     | -                |
| 240590 <sup>7</sup>   | 1                        | -              | -                     | -                |
| 241951 <sup>8</sup>   | 1                        | -              | -                     | -                |
| 292077 <sup>9</sup>   | 9                        | -              | 4                     | -                |
| 302015 <sup>10</sup>  | -                        | -              | 1                     | -                |
| 412556 <sup>11</sup>  | -                        | 1              | -                     | -                |
| 415378 <sup>12</sup>  | 15                       | -              | 2                     | -                |
| 444696 <sup>13</sup>  | 2                        | -              | -                     | -                |
| 591189 <sup>14</sup>  | 18                       | -              | 4                     | -                |
| 726063 <sup>15</sup>  | 1                        | -              | -                     | -                |
| 740440 <sup>16</sup>  | 1                        | -              | 1                     | -                |
| 1077356 <sup>17</sup> | 2                        | -              | 1                     | -                |
| 1170193 <sup>18</sup> | 1                        | -              | 1                     | -                |
| 652277                | -                        | 26             | -                     | -                |
| 743332                | 2                        | 31             | -                     | -                |
| 720632                | 329                      | 518            | 114                   | -                |
| 686996                | -                        | -              | -                     | 500 <sup>†</sup> |
| Total                 | 433                      | 579            | 144                   | 500              |

<sup>†</sup> Randomly selected

**Table S2.** The information of 1656 samples

For more details please refer to the excel file: “TableS2.The\_information\_of\_1656\_samples.xlsx”

<sup>†</sup> Dataset. M: training/validation set; T: test set;

<sup>‡</sup> AC<sub>50</sub>: the concentration causing half-maximal (50%) response;

<sup>§</sup> IC<sub>50</sub>: the concentration causing half-maximal (50%) inhibition.

**Table S3.** Definitions of 200 RDKit descriptors

| No. | RDKit Descriptors        | Definition                                                                                              |
|-----|--------------------------|---------------------------------------------------------------------------------------------------------|
| 1   | FractionCSP3             | The fraction of carbons that are sp <sup>3</sup> hybridized                                             |
| 2   | NHOHCount                | Number of NHs and OHs                                                                                   |
| 3   | NOCOUNT                  | Number of Nitrogen and Oxygen atoms                                                                     |
| 4   | NumAliphaticCarbocycles  | Number of aliphatic carbocycles in a molecule                                                           |
| 5   | NumAliphaticHeterocycles | Number of aliphatic heterocycles in a molecule                                                          |
| 6   | NumAliphaticRings        | Number of aliphatic rings in a molecule                                                                 |
| 7   | NumAromaticCarbocycles   | Number of aromatic carbocycles in a molecule                                                            |
| 8   | NumAromaticHeterocycles  | Number of aromatic heterocycles in a molecule                                                           |
| 9   | NumAromaticRings         | Number of aromatic rings in a molecule                                                                  |
| 10  | NumHAcceptors            | Number of Hydrogen Bond Acceptors                                                                       |
| 11  | NumHDonors               | Number of Hydrogen Bond Donors                                                                          |
| 12  | NumSaturatedCarbocycles  | Number of saturated carbocycles in a molecule                                                           |
| 13  | NumSaturatedHeterocycles | Number of saturated heterocycles in a molecule                                                          |
| 14  | NumSaturatedRings        | Number of saturated rings in a molecule                                                                 |
| 15  | MolLogP                  | Molecular partition coefficient between aqueous and lipophilic phases <sup>19</sup>                     |
| 16  | MolMR                    | Molar refractivity of molecule <sup>19</sup>                                                            |
| 17  | NumHeteroatoms           | Number of heteroatoms in a molecule                                                                     |
| 18  | NumRotatableBonds        | Number of rotatable bonds in a molecule                                                                 |
| 19  | RingCount                | Number of ring in a molecule                                                                            |
| 20  | HeavyAtomCount           | Number of heavy atom in a molecule                                                                      |
| 21  | MolWt                    | The average molecular weight of the molecule                                                            |
| 22  | HeavyAtomMolWt           | Molecular weight of heavy atom                                                                          |
| 23  | NumValenceElectrons      | Number of valence electrons                                                                             |
| 24  | NumRadicalElectrons      | Number of radical electrons                                                                             |
| 25  | qed                      | Index for quantitative estimation of drug-likeness                                                      |
| 26  | ExactMolWt               | The exact molecular weight of the molecule                                                              |
| 27  | MaxPartialCharge         | Atomic charges measured by Gasteiger and Marsili <sup>20</sup>                                          |
| 28  | MinPartialCharge         |                                                                                                         |
| 29  | MaxAbsPartialCharge      |                                                                                                         |
| 30  | MinAbsPartialCharge      |                                                                                                         |
| 31  | FpDensityMorgan1         | Fingerprints density based on the Morgan algorithm, similar to the ECFP/FCFP fingerprints <sup>21</sup> |
| 32  | FpDensityMorgan2         |                                                                                                         |
| 33  | FpDensityMorgan3         |                                                                                                         |
| 34  | BalabanJ                 | Highly discriminating distance-based topological index <sup>22</sup>                                    |
| 35  | BertzCT                  | The general index of molecular complexity <sup>23</sup>                                                 |

|         |                                   |                                                                                                                                              |
|---------|-----------------------------------|----------------------------------------------------------------------------------------------------------------------------------------------|
| 36      | HallKierAlpha                     | Hall-Kier alpha value <sup>24</sup>                                                                                                          |
| 37, 38  | Chi0, Chi1                        | Molecular connectivity chi and kappa shape indexes <sup>24</sup>                                                                             |
| 39-43   | Chi0v, Chi1v, Chi2v, Chi3v, Chi4v |                                                                                                                                              |
| 44-46   | Kappa1, Kappa2, Kappa3            |                                                                                                                                              |
| 47-51   | Chi0n, Chi1n, Chi2n, Chi3n, Chi4n | Similar to Hall Kier ChiXv, but uses nVal instead of valence                                                                                 |
| 52      | Ipc                               | The coefficients of the characteristic polynomial of the adjacency matrix of a hydrogen-suppressed graph of a molecule <sup>25</sup>         |
| 53      | LabuteASA                         | The approximate molecular van der Waals surface area <sup>26</sup>                                                                           |
| 54-67   | PEOE-VSA1 - PEOE-VSA14            | The van der Waals surface area of molecular electrostatic interactions <sup>26</sup>                                                         |
| 68-77   | SMR-VSA1 - SMR-VSA10              | The van der Waals surface area of molecular polarizability <sup>26</sup>                                                                     |
| 78-89   | SlogP-VSA1 - SlogP-VSA12          | The van der Waals surface area of molecular hydrophobic and hydrophilic effects <sup>26</sup>                                                |
| 90      | TPSA                              | Molecular topological polar surface area <sup>27</sup>                                                                                       |
| 91-100  | VSA-EState1 - VSA-EState10        | MOE-type descriptors using electrotopological state indices and surface area contributions (developed at RD, not described in the CCG paper) |
| 101-111 | EState-VSA1 - EState-VSA11        |                                                                                                                                              |
| 112     | MaxEStateIndex                    |                                                                                                                                              |
| 113     | MinEStateIndex                    |                                                                                                                                              |
| 114     | MaxAbsEStateIndex                 |                                                                                                                                              |
| 115     | MinAbsEStateIndex                 |                                                                                                                                              |
| 116     | fr-Al-COO                         | Number of aliphatic carboxylic acids                                                                                                         |
| 117     | fr-aldehyde                       | Number of aldehydes                                                                                                                          |
| 118     | fr-alkyl-carbamate                | Number of alkyl carbamates                                                                                                                   |
| 119     | fr-alkyl-halide                   | Number of alkyl halides                                                                                                                      |
| 120     | fr-allylic-oxid                   | Number of allylic oxidation sites excluding steroid dienone                                                                                  |
| 121     | fr-Al-OH                          | Number of aliphatic hydroxyl groups                                                                                                          |
| 122     | fr-Al-OH-noTert                   | Number of aliphatic hydroxyl groups excluding tert-OH                                                                                        |
| 123     | fr-amide                          | Number of amides                                                                                                                             |
| 124     | fr-amidine                        | Number of amidine groups                                                                                                                     |
| 125     | fr-aniline                        | Number of anilines                                                                                                                           |
| 126     | fr-Ar-COO                         | Number of Aromatic carboxylic acids                                                                                                          |
| 127     | fr-ArN                            | Number of N functional groups attached to aromatics                                                                                          |
| 128     | fr-Ar-N                           | Number of aromatic nitrogens                                                                                                                 |
| 129     | fr-Ar-NH                          | Number of aromatic amines                                                                                                                    |
| 130     | fr-Ar-OH                          | Number of aromatic hydroxyl groups                                                                                                           |
| 131     | fr-aryl-methyl                    | Number of aryl methyl sites for hydroxylation                                                                                                |
| 132     | fr-azide                          | Number of azide groups                                                                                                                       |
| 133     | fr-azo                            | Number of azo groups                                                                                                                         |

|     |                    |                                                          |
|-----|--------------------|----------------------------------------------------------|
| 134 | fr-barbitur        | Number of barbiturate groups                             |
| 135 | fr-benzene         | Number of benzene rings                                  |
| 136 | fr-benzodiazepine  | Number of benzodiazepines with no additional fused rings |
| 137 | fr-bicyclic        | Number of bicyclic rings                                 |
| 138 | fr-C-O             | Number of carbonyl                                       |
| 139 | fr-C-O-noCOO       | Number of carbonyl "O" excluding COOH                    |
| 140 | fr-COO             | Number of carboxylic acids                               |
| 141 | fr-COO2            | Number of carboxylic acids                               |
| 142 | fr-C-S             | Number of thiocarbonyl                                   |
| 143 | fr-diazo           | Number of diazo groups                                   |
| 144 | fr-dihydropyridine | Number of dihydropyridines                               |
| 145 | fr-epoxide         | Number of epoxide rings                                  |
| 146 | fr-ester           | Number of esters                                         |
| 147 | fr-ether           | Number of ether oxygens (including phenoxy)              |
| 148 | fr-furan           | Number of furan rings                                    |
| 149 | fr-guanido         | Number of guanidine groups                               |
| 150 | fr-halogen         | Number of halogens                                       |
| 151 | fr-hdrzine         | Number of hydrazine groups                               |
| 152 | fr-hdrzone         | Number of hydrazone groups                               |
| 153 | fr-HOCCN           | Number of C(OH)CCN-Ctert-alkyl or C(OH)CCNcyclic         |
| 154 | fr-imidazole       | Number of imidazole rings                                |
| 155 | fr-imide           | Number of imide groups                                   |
| 156 | fr-Imine           | Number of Imines                                         |
| 157 | fr-isocyan         | Number of isocyanates                                    |
| 158 | fr-isothiocyan     | Number of isothiocyanates                                |
| 159 | fr-ketone          | Number of ketones                                        |
| 160 | fr-ketone-Topliss  | Number of ketones excluding "diaryl" "a,b-unsat"         |
| 161 | fr-lactam          | Number of beta lactams                                   |
| 162 | fr-lactone         | Number of cyclic esters (lactones)                       |
| 163 | fr-methoxy         | Number of methoxy groups 0                               |
| 164 | fr-morpholine      | Number of morpholine rings                               |
| 165 | fr-Ndealkylation1  | Number of XCCNR groups                                   |
| 166 | fr-Ndealkylation2  | Number of tert-alicyclic amines                          |
| 167 | fr-NH0             | Number of Tertiary amines                                |
| 168 | fr-NH1             | Number of Secondary amines                               |
| 169 | fr-NH2             | Number of Primary amines                                 |
| 170 | fr-Nhpyrrole       | Number of H-pyrrole nitrogens                            |

|     |                        |                                                     |
|-----|------------------------|-----------------------------------------------------|
| 171 | fr-nitrile             | Number of nitriles                                  |
| 172 | fr-nitro               | Number of nitro groups                              |
| 173 | fr-nitro-arom          | Number of nitro benzene ring substituents           |
| 174 | fr-nitro-arom-nonortho | Number of non-ortho nitro benzene ring substituents |
| 175 | fr-nitroso             | Number of nitroso groups excluding NO <sub>2</sub>  |
| 176 | fr-N-O                 | Number of hydroxylamine groups                      |
| 177 | fr-oxazole             | Number of oxazole rings                             |
| 178 | fr-oxime               | Number of oxime groups                              |
| 179 | fr-para-hydroxylation  | Number of para-hydroxylation sites                  |
| 180 | fr-phenol              | Number of phenols                                   |
| 181 | fr-phenol-noOrthoHbond | Number of phenolic OH                               |
| 182 | fr-phos-acid           | Number of phosphoric acid groups                    |
| 183 | fr-phos-ester          | Number of phosphoric ester groups                   |
| 184 | fr-piperdine           | Number of piperdine rings                           |
| 185 | fr-piperzine           | Number of piperzine rings                           |
| 186 | fr-priamide            | Number of primary amides                            |
| 187 | fr-prisulfonamd        | Number of primary sulfonamides                      |
| 188 | fr-pyridine            | Number of pyridine rings                            |
| 189 | fr-quatN               | Number of quarternary nitrogens                     |
| 190 | fr-SH                  | Number of thiol groups                              |
| 191 | fr-sulfide             | Number of thioether                                 |
| 192 | fr-sulfonamd           | Number of sulfonamides                              |
| 193 | fr-sulfone             | Number of sulfone groups                            |
| 194 | fr-term-acetylene      | Number of terminal acetylenes                       |
| 195 | fr-tetrazole           | Number of tetrazole rings                           |
| 196 | fr-thiazole            | Number of thiazole rings                            |
| 197 | fr-thiocyan            | Number of thiocyanates                              |
| 198 | fr-thiophene           | Number of thiophene rings                           |
| 199 | fr-unbrch-alkane       | Number of unbranched alkanes of at least 4 members  |
| 200 | fr-urea                | Number of urea groups                               |

**Table S4.** The representative confusion matrices of five machine learning models on training set

| ML models | Confusion matrix |     |     | Performance |      |      |      |            |
|-----------|------------------|-----|-----|-------------|------|------|------|------------|
|           |                  | CP  | CN  | Acc         | Spe  | Sen  | MCC  | Random Acc |
| KNN       | PCP              | 226 | 61  | 0.83        | 0.82 | 0.84 | 0.65 | 0.503      |
|           | PCN              | 43  | 277 |             |      |      |      |            |
| GNB       | PCP              | 215 | 44  | 0.83        | 0.87 | 0.80 | 0.67 | 0.508      |
|           | PCN              | 54  | 294 |             |      |      |      |            |
| RF        | PCP              | 258 | 0   | 0.98        | 1.00 | 0.96 | 0.97 | 0.509      |
|           | PCN              | 11  | 338 |             |      |      |      |            |
| SVM       | PCP              | 159 | 44  | 0.74        | 0.87 | 0.59 | 0.49 | 0.519      |
|           | PCN              | 110 | 294 |             |      |      |      |            |
| LR        | PCP              | 239 | 31  | 0.90        | 0.91 | 0.89 | 0.79 | 0.506      |
|           | PCN              | 30  | 307 |             |      |      |      |            |

\*Performances of 5 ML models (Figure 4) were obtained from 10-times repeated ML modeling

CP: condition positive; CN: condition negative; PCP: predicted condition positive; PCN: predicted condition negative.

**Table S5.** The representative confusion matrices of five machine learning models on validation set

| ML models | Confusion matrix |     |     | Performance |      |      |      |            |
|-----------|------------------|-----|-----|-------------|------|------|------|------------|
|           |                  | CP  | CN  | Acc         | Spe  | Sen  | MCC  | Random Acc |
| KNN       | PCP              | 121 | 55  | 0.76        | 0.77 | 0.74 | 0.51 | 0.512      |
|           | PCN              | 43  | 186 |             |      |      |      |            |
| GNB       | PCP              | 103 | 51  | 0.72        | 0.79 | 0.63 | 0.42 | 0.523      |
|           | PCN              | 61  | 190 |             |      |      |      |            |
| RF        | PCP              | 107 | 34  | 0.77        | 0.86 | 0.65 | 0.50 | 0.529      |
|           | PCN              | 57  | 207 |             |      |      |      |            |
| SVM       | PCP              | 97  | 29  | 0.76        | 0.88 | 0.59 | 0.50 | 0.536      |
|           | PCN              | 67  | 212 |             |      |      |      |            |
| LR        | PCP              | 125 | 43  | 0.80        | 0.82 | 0.76 | 0.58 | 0.516      |
|           | PCN              | 39  | 198 |             |      |      |      |            |

CP: condition positive; CN: condition negative; PCP: predicted condition positive; PCN: predicted condition negative.



**Table S6.** The 5-fold cross-validation results of the ML models

| Model | K-fold | ACC        | AUC        | SPE        | SEN        |
|-------|--------|------------|------------|------------|------------|
| LR    | 5      | 0.78±0.047 | 0.78±0.029 | 0.80±0.032 | 0.71±0.034 |
| KNN   | 5      | 0.71±0.335 | 0.77±0.038 | 0.72±0.034 | 0.70±0.041 |
| GNB   | 5      | 0.58±0.054 | 0.61±0.064 | 0.58±0.054 | 0.58±0.052 |
| RF    | 5      | 0.72±0.055 | 0.75±0.044 | 0.70±0.026 | 0.66±0.045 |
| SVM   | 5      | 0.66±0.027 | 0.74±0.060 | 0.78±0.036 | 0.63±0.031 |

\*SVM model: a radial basis function (RBF) kernel was used, of which the C and  $\gamma$  were set as 1 and ‘auto’, respectively; LR model: the inverse of regularization strength, tolerance for stopping criteria, maximum number of iterations, and penalty were set as 0.5, 0.001, 200, and “L1” respectively. Herein, default parameters were used for the ML models if not specified.

**Table S7.** The representative confusion matrices of five machine learning models on test set

| ML models | Confusion matrix |     |     | Performance |      |      |      |            |
|-----------|------------------|-----|-----|-------------|------|------|------|------------|
|           |                  | CP  | CN  | Acc         | Spe  | Sen  | MCC  | Random Acc |
| KNN       | PCP              | 96  | 72  | 0.82        | 0.86 | 0.67 | 0.51 | 0.632      |
|           | PCN              | 48  | 428 |             |      |      |      |            |
| GNB       | PCP              | 88  | 102 | 0.76        | 0.80 | 0.61 | 0.38 | 0.613      |
|           | PCN              | 56  | 398 |             |      |      |      |            |
| RF        | PCP              | 86  | 55  | 0.82        | 0.89 | 0.6  | 0.49 | 0.655      |
|           | PCN              | 58  | 445 |             |      |      |      |            |
| SVM       | PCP              | 82  | 31  | 0.86        | 0.94 | 0.57 | 0.56 | 0.679      |
|           | PCN              | 62  | 469 |             |      |      |      |            |
| LR        | PCP              | 102 | 49  | 0.86        | 0.90 | 0.71 | 0.60 | 0.647      |
|           | PCN              | 42  | 451 |             |      |      |      |            |

CP: condition positive; CN: condition negative; PCP: predicted condition positive; PCN: predicted condition negative.

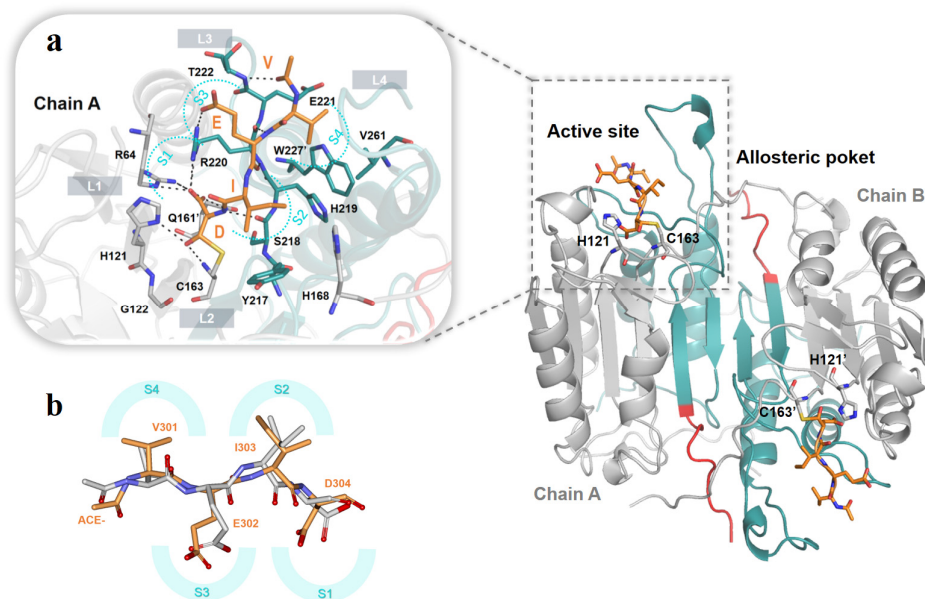

**Figure S1.** Result of molecular docking. (a) Crucial residues involved in caspase-6 active pocket (PDB ID: 3OD5). The Ac-VEID-CHO and hydrogen bonds are shown in orange and black dashed lines. The large and small subunits are represented in grey and blue, respectively. The parts of the IL domain (loops L2 and L2' residues 198-205) are coloured red. The catalytic dyad residues His121 and Cys163 are represented as sticks. Pocket S1-S4 are shown in blue arcs. (b) Alignments of docking conformation (grey) with naïve conformation (orange). The total score ( $-\log(KD)$ ) and RMSD of the optimal docking conformation were 7.67 and 1.62Å.

## References:

1. Wang, Y.; Huang, J. C.; Zhou, Z. L.; Yang, W.; Guastella, J.; Drewe, J.; Cai, S. X., Dipeptidyl aspartyl fluoromethylketones as potent caspase-3 inhibitors: SAR of the P-2 amino acid. *Bioorg. Med. Chem. Lett.* **2004**, *14* (5), 1269-1272.
2. Choong, I. C.; Lew, W.; Lee, D.; Pham, P.; Burdett, M. T.; Lam, J. W.; Wiesmann, C.; Luong, T. N.; Fahr, B.; DeLano, W. L.; McDowell, R. S.; Allen, D. A.; Erlanson, D. A.; Gordon, E. M.; O'Brien, T., Identification of potent and selective small-molecule inhibitors of caspase-3 through the use of extended tethering and structure-based drug design. *J. Med. Chem.* **2002**, *45* (23), 5005-5022.
3. Lee, D.; Long, S. A.; Murray, J. H.; Adams, J. L.; Nuttall, M. E.; Nadeau, D. P.; Kikly, K.; Winkler, J. D.; Sung, C. M.; Ryan, M. D.; Levy, M. A.; Keller, P. M.; DeWolf, W. E., Potent and selective nonpeptide inhibitors of caspases 3 and 7. *J. Med. Chem.* **2001**, *44* (12), 2015-2026.
4. Asgian, J. L.; James, K. E.; Li, Z. Z.; Carter, W.; Barrett, A. J.; Mikolajczyk, J.; Salvesen, G. S.; Powers, J. C., Aza-peptide epoxides: A new class of inhibitors selective for clan CD cysteine proteases. *J. Med. Chem.* **2002**, *45* (23), 4958-4960.
5. Linton, S. D.; Karanewsky, D. S.; Ternansky, R. J.; Wu, J. C.; Pham, B.; Kodandapani, L.; Smidt, R.; Diaz, J. L.; Fritz, L. C.; Tomaselli, K. J., Acyl Dipeptides as reversible caspase inhibitors. Part 1: Initial lead optimization. *Bioorg. Med. Chem. Lett.* **2002**, *12* (20), 2969-2971.
6. Linton, S. D.; Karanewsky, D. S.; Ternansky, R. J.; Chen, N.; Guo, M.; Jahangiri, K. G.; Kalish, V. J.; Meduna, S. P.; Robinson, E. D.; Ullman, B. R.; Wu, J. C.; Pham, B.; Kodandapani, L.; Smidt, R.; Diaz, J. L.; Fritz, L. C.; von Krosigk, U.; Roggo, S.; Schmitz, A.; Tomaselli, K. J., Acyl Dipeptides as reversible caspase inhibitors. Part 2: Further optimization. *Bioorg. Med. Chem. Lett.* **2002**, *12* (20), 2973-2975.
7. Wang, Y.; Guan, L. F.; Jia, S. J.; Tseng, B.; Drewe, J.; Cai, S. X., Dipeptidyl aspartyl fluoromethylketones as potent caspase inhibitors: peptidomimetic replacement of the P-2 alpha-amino acid by a alpha-hydroxy acid. *Bioorg. Med. Chem. Lett.* **2005**, *15* (5), 1379-1383.
8. Han, Y. X.; Giroux, A.; Colucci, J.; Bayly, C. I.; McKay, D. J.; Roy, S.; Xanthoudakis, S.; Vaillancourt, J.; Rasper, D. M.; Tam, J.; Tawa, P.; Nicholson, D. W.; Zamboni, R. J., Novel pyrazinone mono-amides as potent and reversible caspase-3 inhibitors. *Bioorg. Med. Chem. Lett.* **2005**, *15* (4), 1173-1180.
9. Chu, W. H.; Rothfuss, J.; d'Avignon, A.; Zeng, C. B.; Zhou, D.; Hotchkiss, R. S.; Mach, R. H., Isatin sulfonamide analogs containing a michael addition acceptor: A new class of caspase 3/7 inhibitors. *J. Med. Chem.* **2007**, *50* (15), 3751-3755.
10. Wang, Y.; Jia, S. J.; Tseng, B.; Drewe, J.; Cai, S. X., Dipeptidyl aspartyl fluoromethylketones as potent caspase inhibitors: Peptidomimetic replacement of the P-2 amino acid by 2-aminoaryl acids and other non-natural amino acids. *Bioorg. Med. Chem. Lett.* **2007**, *17* (22), 6178-6182.
11. Thompson, C. M.; Quinn, C. A.; Hergenrother, P. J., Total Synthesis and Cytoprotective Properties of Dykellic Acid. *J. Med. Chem.* **2009**, *52* (1), 117-125.
12. Chu, W. H.; Rothfuss, J.; Chu, Y. X.; Zhou, D.; Mach, R. H., Synthesis and in Vitro Evaluation of Sulfonamide Isatin Michael Acceptors as Small Molecule Inhibitors of Caspase-6. *J. Med. Chem.* **2009**, *52* (8), 2188-2191.
13. Mott, B. T.; Ferreira, R. S.; Simeonov, A.; Jadhav, A.; Ang, K. K. H.; Leister, W.; Shen, M.; Silveira, J.

- T.; Doyle, P. S.; Arkin, M. R.; McKerrow, J. H.; Inglesse, J.; Austin, C. P.; Thomas, C. J.; Shoichet, B. K.; Maloney, D. J., Identification and Optimization of Inhibitors of Trypanosomal Cysteine Proteases: Cruzain, Rhodesain, and TbCatB. *J. Med. Chem.* **2010**, *53* (1), 52-60.
14. Chu, W. H.; Rothfuss, J.; Zhou, D.; Mach, R. H., Synthesis and evaluation of isatin analogs as caspase-3 inhibitors: Introduction of a hydrophilic group increases potency in a whole cell assay. *Bioorg. Med. Chem. Lett.* **2011**, *21* (8), 2192-2197.
15. Rosse, G., Irreversible Inhibitors of Cysteine Proteases. *ACS Med. Chem. Lett.* **2013**, *4* (2), 163-164.
16. Limpachayaporn, P.; Schafers, M.; Schober, O.; Kopka, K.; Haufe, G., Synthesis of new fluorinated, 2-substituted 5-pyrrolidinylsulfonyl isatin derivatives as caspase-3 and caspase-7 inhibitors: Nonradioactive counterparts of putative PET-compatible apoptosis imaging agents. *Bioorg. Med. Chem.* **2013**, *21* (7), 2025-2036.
17. Krause-Heuer, A. M.; Howell, N. R.; Matesic, L.; Dhand, G.; Young, E. L.; Burgess, L.; Jiang, C. D.; Lengkeek, N. A.; Fookes, C. J. R.; Pham, T. Q.; Sobrio, F.; Greguric, I.; Fraser, B. H., A new class of fluorinated 5-pyrrolidinylsulfonyl isatin caspase inhibitors for PET imaging of apoptosis. *Medchemcomm* **2013**, *4* (2), 347-352.
18. Limpachayaporn, P.; Wagner, S.; Kopka, K.; Schober, O.; Schafers, M.; Haufe, G., Synthesis of 7-Halogenated Isatin Sulfonamides: Nonradioactive Counterparts of Caspase-3/-7 Inhibitor-Based Potential Radiopharmaceuticals for Molecular Imaging of Apoptosis. *J. Med. Chem.* **2014**, *57* (22), 9383-9395.
19. Wildman, S. A.; Crippen, G. M., Prediction of physicochemical parameters by atomic contributions. *J. Chem. Inf. Comput. Sci.* **1999**, *39* (5), 868-873.
20. Gasteiger, J.; Marsili, M., Iterative Partial Equalization of Orbital Electronegativity - a Rapid Access to Atomic Charges. *Tetrahedron* **1980**, *36* (22), 3219-3228.
21. Rogers, D.; Hahn, M., Extended-Connectivity Fingerprints. *J. Chem. Inf. Model.* **2010**, *50* (5), 742-754.
22. Balaban, A. T., Highly Discriminating Distance-Based Topological Index. *Chem. Phys. Lett.* **1982**, *89* (5), 399-404.
23. Bertz, S. H., The first general index of molecular complexity. *J. Am. Chem. Soc.* **1981**, *103* (12), 3599-3601.
24. Hall, L. H.; Kier, L. B., The molecular connectivity chi indexes and kappa shape indexes in structure-property modeling. *Reviews in computational chemistry* **1991**, *2*, 367-422.
25. Bonchev, D.; Trinajstić, N., Information-Theory, Distance Matrix, and Molecular Branching. *J. Chem. Phys.* **1977**, *67* (10), 4517-4533.
26. Labute, P., A widely applicable set of descriptors. *J. Mol. Graph. Model.* **2000**, *18* (4-5), 464-477.
27. Ertl, P.; Rohde, B.; Selzer, P., Fast calculation of molecular polar surface area as a sum of fragment-based contributions and its application to the prediction of drug transport properties. *J. Med. Chem.* **2000**, *43* (20), 3714-3717.
